# Supplementary material for: Association between Microbiome-Related Human Genetic Variants and Fasting Plasma Glucose in a High-Cardiovascular-Risk Mediterranean Population
Source: MDPI journal article supplement (doi:10.3390/medicina58091238), 2022-09-07
Supplement: s1 [file s1]

# Association between microbiome-related human genetic variants and fasting plasma glucose in a high-cardiovascular risk Mediterranean population

Eva M Asensio, Carolina Ortega-Azorín, Rocío Barragán, Andrea Alvarez-Sala, José V. Sorlí, Eva C. Pascual, Rebeca Fernández-Carrión, Laura V Villamil, Dolores Corella, Oscar Coltell

## SUPPLEMENTAL TABLES AND FIGURES

**Table S1.** Microbiome-related SNPs selected for this study: initial mbGWAS generating the association (STD#), SNP location and microbial trait.

**Table S2.** Association between the ordered (by p-value) microbiota-related SNPs and fasting glucose in the whole population<sup>1</sup> (continuation of Table 2)<sup>1</sup>.

**Table S3.** Association between the microbiota-related SNPs and diabetes in non-diabetic subjects<sup>1</sup>.

**Table S4.** Interaction between the top-ranked microbiota-related SNPs and sex on plasma fasting glucose in the whole population<sup>1</sup>.

**Table S5.** Selected instruments for the Two-sample Mendelian randomization analysis on plasma glucose.

**Table S1. Microbiome-related SNPs selected for this study: initial mbGWAS generating the association (STD#), SNP location and microbial trait.**

| Study code | Microbial trait                                          | SNP        | Chr | Gene         |
|------------|----------------------------------------------------------|------------|-----|--------------|
| STD2       | <i>genus.Allisonella.id.2174</i>                         | rs1004787  | 2   | LOC107985879 |
| STD2       | <i>genus.Romboutsia.id.11347</i>                         | rs10064431 | 5   | FAM172A      |
| STD2       | <i>genus.Allisonella.id.2174</i>                         | rs10087900 | 8   | intergenic   |
| STD2       | <i>genus.CandidatusSoleaferrea.id.11350</i>              | rs10090365 | 8   | intergenic   |
| STD2       | <i>genus.Romboutsia.id.11347</i>                         | rs10091895 | 8   | CSMD1        |
| STD2       | <i>genus.Faecalibacterium.id.2057</i>                    | rs10127720 | 1   | intergenic   |
| STD2       | <i>genus..Ruminococcustorquesgroup.id.14377</i>          | rs1014174  | 2   | PID1         |
| STD1       | <i>O_Rhodospirillales_RNT</i>                            | rs1014306  | 9   | DAPK1        |
| STD2       | <i>genus.Ruminococcus1.id.11373</i>                      | rs1014486  | 3   | IL12A-AS1    |
| STD4       | <i>genus_Desulfovibrio</i>                               | rs10173922 | 2   | LOC105373456 |
| STD2       | <i>genus.Erysipelatoclostridium.id.11381</i>             | rs10185424 | 2   | intergenic   |
| STD4       | <i>family_Pasteurellaceae</i>                            | rs1021993  | 1   | intergenic   |
| STD2       | <i>genus..Eubacteriumcoprostanoligenesgroup.id.11375</i> | rs10241138 | 7   | ADCYAP1R1    |
| STD2       | <i>genus.Peptococcus.id.2037</i>                         | rs1024582  | 12  | CACNA1C      |
| STD2       | <i>class.Actinobacteria.id.419</i>                       | rs10267710 | 7   | intergenic   |
| STD2       | <i>genus.Streptococcus.id.1853</i>                       | rs10273733 | 7   | BCAP29       |
| STD2       | <i>genus.Romboutsia.id.11347</i>                         | rs10279978 | 7   | SLC29A4      |
| STD3       | <i>g__Holdemania</i>                                     | rs1035177  | 20  | MACROD2      |
| STD2       | <i>genus..Ruminococcustorquesgroup.id.14377</i>          | rs10401969 | 19  | SUGP1        |
| STD2       | <i>genus.Erysipelatoclostridium.id.11381</i>             | rs1042058  | 10  | MAP3K8       |
| STD2       | <i>genus..Eubacteriumcoprostanoligenesgroup.id.11375</i> | rs10444197 | 10  | LOC105376348 |
| STD2       | <i>genus.Faecalibacterium.id.2057</i>                    | rs10488631 | 7   | TNPO3        |
| STD4       | <i>genus_Fusobacterium</i>                               | rs10489747 | 1   | RXRG         |
| STD4       | <i>genus_Eubacterium</i>                                 | rs10490411 | 2   | intergenic   |
| STD4       | <i>family_Pasteurellaceae</i>                            | rs10494924 | 1   | intergenic   |
| STD4       | <i>genus_Coproccoccus</i>                                | rs10496481 | 2   | DPP10        |
| STD4       | <i>genus_Fusobacterium</i>                               | rs10498546 | 14  | CEP128       |
| STD2       | <i>genus..Ruminococcustorquesgroup.id.14377</i>          | rs10498633 | 14  | SLC24A4      |
| STD4       | <i>order_Selenomonadales</i>                             | rs10516879 | 4   | CCSER1       |
| STD2       | <i>genus.Allisonella.id.2174</i>                         | rs10520163 | 4   | CLCN3        |
| STD2       | <i>order.Gastranaerophilales.id.1591</i>                 | rs1062633  | 3   | MST1R        |
| STD2       | <i>genus.Oxalobacter.id.2978</i>                         | rs10739743 | 9   | intergenic   |
| STD2       | <i>genus.Tyzzereella3.id.11335</i>                       | rs10752747 | 1   | MMEL1        |
| STD2       | <i>genus.Ruminococcus1.id.11373</i>                      | rs10777875 | 12  | RMST         |
| STD2       | <i>family.Oxalobacteraceae.id.2966</i>                   | rs10780691 | 9   | NTRK2        |
| STD2       | <i>genus.Intestinibacter.id.11345</i>                    | rs10805326 | 4   | intergenic   |
| STD2       | <i>genus.Allisonella.id.2174</i>                         | rs10828248 | 10  | MLLT10       |
| STD2       | <i>order.Bifidobacteriales.id.432</i>                    | rs10831953 | 11  | intergenic   |
| STD2       | <i>genus.Oxalobacter.id.2978</i>                         | rs10868238 | 9   | NTRK2        |
| STD2       | <i>genus.Erysipelatoclostridium.id.11381</i>             | rs10868677 | 9   | intergenic   |
| STD2       | <i>class.Actinobacteria.id.419</i>                       | rs10871420 | 16  | LOC105369213 |
| STD3       | <i>g__Hydrogenophaga</i>                                 | rs10914206 | 1   | intergenic   |
| STD2       | <i>order.Gastranaerophilales.id.1591</i>                 | rs10994397 | 10  | ANK3         |
| STD4       | <i>genus_Coproccoccus</i>                                | rs11123259 | 2   | DPP10        |
| STD4       | <i>genus_Lactobacillus</i>                               | rs11126954 | 2   | LOC107985905 |
| STD1       | <i>O_Rhodospirillales_RNT</i>                            | rs11141878 | 9   | DAPK1        |

**Table S1. Microbiome-related SNPs selected for this study: initial mbGWAS generating the association (STD#), SNP location and microbial trait.**

| Study code | Microbial trait                                 | SNP        | Chr | Gene         |
|------------|-------------------------------------------------|------------|-----|--------------|
| STD1       | <i>G_Faecalitalea_HB</i>                        | rs11164526 | 1   | intergenic   |
| STD3       | <i>g_Gillisia</i>                               | rs11165262 | 1   | TGFBR3       |
| STD4       | <i>order_Selenomonadales</i>                    | rs11203893 | 8   | MTUS1        |
| STD1       | <i>G_Dialister_HB</i>                           | rs11218350 | 11  | SORL1        |
| STD2       | <i>family.Oxalobacteraceae.id.2966</i>          | rs11246212 | 11  | PHRF1        |
| STD4       | <i>genus_Anaerotruncus</i>                      | rs11696277 | 20  | PCSK2        |
| STD1       | <i>G_Clostridium_sensu_stricto_HB</i>           | rs11865270 | 16  | ZC3H18       |
| STD4       | <i>order_Selenomonadales</i>                    | rs11935423 | 4   | TRMT10A      |
| STD2       | <i>genus..Ruminococcustorquesgroup.id.14377</i> | rs11940694 | 4   | KLB          |
| STD3       | <i>o_Chloroflexales</i>                         | rs11947461 | 4   | intergenic   |
| STD1       | <i>G_Aestuariispira_HB</i>                      | rs11980485 | 7   | PDE1C        |
| STD1       | <i>O_Rhodospirillales_RNT</i>                   | rs12001404 | 9   | DAPK1        |
| STD1       | <i>C_Deltaproteobacteria_HB</i>                 | rs12004427 | 9   | LOC105376214 |
| STD1       | <i>G_Ruminococcus_HB</i>                        | rs12051754 | 17  | MIR4521      |
| STD3       | <i>s_Megasphaera elsdenii</i>                   | rs12076104 | 1   | CASZ1        |
| STD4       | <i>family_Carnobacteriaceae</i>                 | rs12145418 | 1   | ESRRG        |
| STD2       | <i>order.Bifidobacteriales.id.432</i>           | rs12188164 | 5   | AHRR         |
| STD2       | <i>genus.RuminococcaceaeUCG013.id.11370</i>     | rs12336782 | 9   | intergenic   |
| STD4       | <i>genus_Phascolarctobacterium</i>              | rs12367572 | 12  | NELL2        |
| STD1       | <i>O_Rhodospirillales_RNT</i>                   | rs12378686 | 9   | DAPK1        |
| STD1       | <i>F_Lachnospiraceae_RNT</i>                    | rs12490796 | 3   | LOC105374165 |
| STD2       | <i>genus.RuminococcaceaeUCG009.id.11366</i>     | rs12508214 | 4   | SORCS2       |
| STD4       | <i>family_Enterobacteriaceae</i>                | rs12530266 | 6   | NKAIN2       |
| STD1       | <i>G_Odoribacter_HB</i>                         | rs12597384 | 16  | intergenic   |
| STD3       | <i>g_Parabacteroides</i>                        | rs12673506 | 7   | CHN2         |
| STD2       | <i>genus.Tyzzereella3.id.11335</i>              | rs12713341 | 2   | LOC105377632 |
| STD4       | <i>genus_Lactobacillus</i>                      | rs12714120 | 2   | LOC107985905 |
| STD2       | <i>genus.CandidatusSoleaferrea.id.11350</i>     | rs1295686  | 5   | IL13         |
| STD3       | <i>g_UBA2821</i>                                | rs12995607 | 2   | intergenic   |
| STD3       | <i>g_Herbidospora</i>                           | rs13097088 | 3   | intergenic   |
| STD4       | <i>order_Selenomonadales</i>                    | rs13132148 | 4   | intergenic   |
| STD1       | <i>G_Fusicatenibacter_RNT</i>                   | rs13136928 | 4   | LRBA         |
| STD1       | <i>F_Enterococcaceae_HB</i>                     | rs1318969  | 11  | KIRREL3      |
| STD1       | <i>G_unclassified_P_Firmicutes_RNT</i>          | rs1333344  | 9   | CTNNAL1      |
| STD1       | <i>O_Rhodospirillales_HB</i>                    | rs13375139 | 1   | intergenic   |
| STD4       | <i>genus_Sporacetigenium</i>                    | rs13423976 | 2   | intergenic   |
| STD3       | <i>f_Bin127</i>                                 | rs134974   | 22  | intergenic   |
| STD2       | <i>genus.Peptococcus.id.2037</i>                | rs1421085  | 16  | FTO          |
| STD4       | <i>family_Enterobacteriaceae</i>                | rs1490359  | 6   | NKAIN2       |
| STD4       | <i>genus_Desulfovibrio</i>                      | rs1507705  | 2   | DTNB         |
| STD2       | <i>genus..Ruminococcustorquesgroup.id.14377</i> | rs158487   | 5   | intergenic   |
| STD1       | <i>O_Rhodospirillales_HB</i>                    | rs16833405 | 1   | intergenic   |
| STD1       | <i>F_Sutterellaceae_HB</i>                      | rs16844464 | 4   | DOK7         |
| STD1       | <i>O_Rhodospirillales_RNT</i>                   | rs16877042 | 4   | ZCCHC4       |
| STD1       | <i>G_Dialister_HB</i>                           | rs1699103  | 11  | SORL1        |
| STD4       | <i>genus_Eubacterium</i>                        | rs17039629 | 2   | intergenic   |

**Table S1. Microbiome-related SNPs selected for this study: initial mbGWAS generating the association (STD#), SNP location and microbial trait.**

| Study code | Microbial trait                                 | SNP        | Chr | Gene          |
|------------|-------------------------------------------------|------------|-----|---------------|
| STD1       | <i>F_Desulfovibrionaceae_HB</i>                 | rs17063777 | 4   | intergenic    |
| STD1       | <i>F_Sutterellaceae_HB</i>                      | rs17068792 | 5   | TENM2         |
| STD1       | <i>G_Holdemanella_HB</i>                        | rs17081294 | 6   | LOC107986525  |
| STD4       | <i>order_Rhizobiales</i>                        | rs17103336 | 10  | BTBD16        |
| STD1       | <i>G_Ruminococcus_HB</i>                        | rs17121264 | 11  | FXYD6-FXYD2   |
| STD4       | <i>genus_Desulfovibrio</i>                      | rs17259859 | 10  | intergenic    |
| STD4       | <i>genus_Olsenella</i>                          | rs17505775 | 3   | TP63          |
| STD2       | <i>genus.Oxalobacter.id.2978</i>                | rs17543178 | 6   | BTBD9         |
| STD4       | <i>order_Rhizobiales</i>                        | rs17551124 | 10  | intergenic    |
| STD2       | <i>genus.Tyzzellerella3.id.11335</i>            | rs17706248 | 5   | LOC101929505  |
| STD1       | <i>G_Dialister_HB</i>                           | rs1790213  | 11  | SORL1         |
| STD1       | <i>G_Dialister_HB</i>                           | rs1792113  | 11  | SORL1         |
| STD3       | <i>s__Bifidobacterium adolescentis</i>          | rs182549   | 2   | MCM6          |
| STD4       | <i>order_Selenomonadales</i>                    | rs1922233  | 4   | CCSER1        |
| STD1       | <i>G_Odoribacter_HB</i>                         | rs1951597  | 14  | LOC105370413  |
| STD1       | <i>G_Dialister_HB</i>                           | rs2070045  | 11  | SORL1         |
| STD2       | <i>genus..Ruminococcustorquesgroup.id.14377</i> | rs2109479  | 5   | intergenic    |
| STD3       | <i>g__Prevotellamassilia</i>                    | rs2140551  | 2   | STON1-GTF2A1L |
| STD3       | <i>s__Eubacterium_I ramulus_A</i>               | rs2194316  | 16  | LINC01572     |
| STD4       | <i>genus_Holdemania</i>                         | rs2271001  | 11  | ZDHHC13       |
| STD1       | <i>G_unclassified_P_Firmicutes_RNT</i>          | rs2271878  | 9   | TMEM245       |
| STD3       | <i>c__Paceibacteria</i>                         | rs2277424  | 13  | LINC00346     |
| STD1       | <i>G_Parasutterella_HB</i>                      | rs228752   | 17  | LSM12         |
| STD1       | <i>G_Parasutterella_HB</i>                      | rs228770   | 17  | NAGS          |
| STD3       | <i>s__Faecalibacterium prausnitzii_E</i>        | rs234545   | 15  | intergenic    |
| STD4       | <i>genus_Phascolarctobacterium</i>              | rs2541522  | 16  | TEKT5         |
| STD4       | <i>family_Succinivibrionaceae</i>               | rs2584     | 8   | MCPH1         |
| STD1       | <i>G_unclassified_C_Clostridia_RNT</i>          | rs267786   | 5   | intergenic    |
| STD4       | <i>genus_Sporacetigenium</i>                    | rs2716882  | 17  | intergenic    |
| STD2       | <i>phylum.Actinobacteria.id.400</i>             | rs2736990  | 4   | SNCA          |
| STD1       | <i>G_Butyricicoccus_RNT</i>                     | rs28540434 | 16  | ARHGAP17      |
| STD2       | <i>genus.Streptococcus.id.1853</i>              | rs2854275  | 6   | HLA-DQB1      |
| STD1       | <i>G_Bifidobacterium_HB</i>                     | rs2855306  | 3   | THPO          |
| STD1       | <i>G_Clostridium_sensu_stricto_RNT</i>          | rs2858332  | 6   | intergenic    |
| STD1       | <i>O_Rhodospirillales_RNT</i>                   | rs2875425  | 4   | ZCCHC4        |
| STD4       | <i>genus_Lachnobacterium</i>                    | rs2921739  | 8   | intergenic    |
| STD1       | <i>F_Sutterellaceae_HB</i>                      | rs2938462  | 5   | intergenic    |
| STD4       | <i>genus_Anaerofilum</i>                        | rs3010562  | 6   | intergenic    |
| STD3       | <i>s__UBA2922 sp900313925</i>                   | rs35262813 | 16  | intergenic    |
| STD2       | <i>order.Gastranaerophilales.id.1591</i>        | rs367480   | 11  | SLC22A18      |
| STD4       | <i>genus_Coproccoccus</i>                       | rs3739034  | 2   | intergenic    |
| STD4       | <i>genus_Lactococcus</i>                        | rs3747113  | 22  | SPECC1L       |
| STD1       | <i>G_unclassified_P_Firmicutes_RNT</i>          | rs3818932  | 9   | IKBKAP        |
| STD1       | <i>G_Aestuariaispira_RNT</i>                    | rs3852540  | 12  | LOC105369710  |
| STD1       | <i>G_Streptococcus_HB</i>                       | rs4300218  | 1   | PIK3CD        |
| STD1       | <i>G_Dialister_HB</i>                           | rs4420280  | 11  | SORL1         |

**Table S1. Microbiome-related SNPs selected for this study: initial mbGWAS generating the association (STD#), SNP location and microbial trait.**

| Study code | Microbial trait                                | SNP       | Chr | Gene         |
|------------|------------------------------------------------|-----------|-----|--------------|
| STD1       | <i>G_Fusicatenibacter_RNT</i>                  | rs4458434 | 4   | LRBA         |
| STD4       | <i>genus_Bifidobacterium</i>                   | rs4479964 | 6   | ARHGAP18     |
| STD4       | <i>genus_Desulfovibrio</i>                     | rs4614937 | 2   | LOC105373456 |
| STD4       | <i>genus_Acinetobacter</i>                     | rs4662863 | 2   | intergenic   |
| STD4       | <i>order_Rhizobiales</i>                       | rs4665809 | 2   | intergenic   |
| STD4       | <i>order_Selenomonadales</i>                   | rs4705    | 8   | PDGFRL       |
| STD1       | <i>F_Sutterellaceae_HB</i>                     | rs4756282 | 11  | LDLRAD3      |
| STD1       | <i>G_Butyricoccus_RNT</i>                      | rs4788439 | 16  | ARHGAP17     |
| STD1       | <i>G_Streptococcus_HB</i>                      | rs4799294 | 18  | intergenic   |
| STD4       | <i>genus_Akkermansia</i>                       | rs4894707 | 3   | PLD1         |
| STD3       | <i>s__Rubneribacter sp002159915</i>            | rs4925523 | 1   | intergenic   |
| STD1       | <i>G_Dialister_HB</i>                          | rs4936637 | 11  | SORL1        |
| STD3       | <i>s__Bifidobacterium bifidum</i>              | rs4988235 | 2   | MCM6         |
| STD4       | <i>genus_Desulfovibrio</i>                     | rs517403  | 2   | DTNB         |
| STD1       | <i>G_unclassified_P_Bacteroidetes_HB</i>       | rs561060  | 6   | MTHFD1L      |
| STD1       | <i>G_Desulfovibrio_HB</i>                      | rs583852  | 11  | intergenic   |
| STD1       | <i>G_Holdemanella_HB</i>                       | rs6030140 | 20  | PTPRT        |
| STD4       | <i>genus_Abiotrophia</i>                       | rs6108958 | 20  | LOC105372529 |
| STD4       | <i>genus_Anaerotruncus</i>                     | rs6111497 | 20  | PCSK2        |
| STD1       | <i>G_Dialister_HB</i>                          | rs639648  | 11  | SORL1        |
| STD1       | <i>G_Parasutterella_HB</i>                     | rs640631  | 17  | NAGS         |
| STD1       | <i>G_Senegalimassilia_HB</i>                   | rs6441647 | 3   | intergenic   |
| STD4       | <i>genus_Desulfovibrio</i>                     | rs6463094 | 7   | intergenic   |
| STD3       | <i>c__Syntrophorhabdia</i>                     | rs6468721 | 8   | intergenic   |
| STD4       | <i>genus_Desulfovibrio</i>                     | rs6531212 | 2   | intergenic   |
| STD1       | <i>G_unclassified_F_Erysipelotrichaceae_HB</i> | rs6545561 | 2   | CCDC85A      |
| STD4       | <i>genus_Desulfovibrio</i>                     | rs6546314 | 2   | DTNB         |
| STD1       | <i>G_Clostridium_sensu_stricto_RNT</i>         | rs6562211 | 13  | RFC3         |
| STD1       | <i>C_Actinobacteria_RNT</i>                    | rs6570118 | 6   | intergenic   |
| STD4       | <i>genus_Bifidobacterium</i>                   | rs6683441 | 1   | intergenic   |
| STD4       | <i>genus_Acinetobacter</i>                     | rs6717477 | 2   | intergenic   |
| STD1       | <i>C_Alphaproteobacteria_RNT</i>               | rs6723629 | 2   | CD207        |
| STD1       | <i>G_Bifidobacterium_RNT</i>                   | rs6730157 | 2   | RAB3GAP1     |
| STD1       | <i>G_unclassified_F_Erysipelotrichaceae_HB</i> | rs6733298 | 2   | CCDC85A      |
| STD4       | <i>genus_Desulfovibrio</i>                     | rs6746082 | 2   | DTNB         |
| STD4       | <i>genus_Coprococcus</i>                       | rs6747870 | 2   | TMEM163      |
| STD3       | <i>g__CAG-448</i>                              | rs6766789 | 3   | FHIT         |
| STD3       | <i>s__Anaeromassilibacillus sp001305115</i>    | rs6797860 | 3   | TP63         |
| STD3       | <i>s__Massiliomicrobiota sp002160815</i>       | rs6890044 | 5   | intergenic   |
| STD1       | <i>G_Blautia_RNT</i>                           | rs6891143 | 5   | ARAP3        |
| STD4       | <i>genus_Bifidobacterium</i>                   | rs6999452 | 8   | ZFPM2        |
| STD1       | <i>F_Sutterellaceae_HB</i>                     | rs7104796 | 11  | LDLRAD3      |
| STD1       | <i>G_Blautia_RNT</i>                           | rs7129903 | 11  | intergenic   |
| STD1       | <i>G_unclassified_F_Erysipelotrichaceae_HB</i> | rs7235005 | 18  | LOC105372112 |
| STD1       | <i>G_unclassified_K_Bacteria_RNT</i>           | rs7245009 | 18  | DOK6         |
| STD1       | <i>C_Alphaproteobacteria_RNT</i>               | rs7565578 | 2   | CD207        |

**Table S1. Microbiome-related SNPs selected for this study: initial mbGWAS generating the association (STD#), SNP location and microbial trait.**

| Study code | Microbial trait                           | SNP       | Chr Gene        |
|------------|-------------------------------------------|-----------|-----------------|
| STD1       | <i>F_Sutterellaceae_HB</i>                | rs7568213 | 2 intergenic    |
| STD3       | <i>g_Parabacteroides</i>                  | rs7580217 | 2 KCNK12        |
| STD3       | <i>s_Lawsonibacter sp002161175</i>        | rs7631252 | 3 intergenic    |
| STD1       | <i>F_Desulfovibrionaceae_HB</i>           | rs7654391 | 4 intergenic    |
| STD1       | <i>G_Fusicatenibacter_RNT</i>             | rs7657948 | 4 LRBA          |
| STD1       | <i>G_Holdemanella_HB</i>                  | rs7740164 | 6 LOC107986525  |
| STD3       | <i>g_Achromobacter</i>                    | rs7773795 | 6 RTN4IP1       |
| STD3       | <i>g_CAG-632</i>                          | rs7958254 | 12 intergenic   |
| STD3       | <i>f_TMED109</i>                          | rs7973111 | 12 LOC105369901 |
| STD4       | <i>order_Rhizobiales</i>                  | rs8037033 | 15 FMN1         |
| STD4       | <i>genus_Bifidobacterium</i>              | rs8056064 | 16 CDH13        |
| STD4       | <i>genus_Bifidobacterium</i>              | rs8063330 | 16 intergenic   |
| STD1       | <i>F_Desulfovibrionaceae_HB</i>           | rs820136  | 17 MYO15B       |
| STD1       | <i>G_Subdoligranulum_HB</i>               | rs860912  | 10 LOC105378531 |
| STD1       | <i>G_unclassified_P_Proteobacteria_HB</i> | rs867426  | 1 intergenic    |
| STD4       | <i>genus_Faecalibacterium</i>             | rs910633  | 1 intergenic    |
| STD4       | <i>genus_Desulfovibrio</i>                | rs936012  | 2 DTNB          |
| STD4       | <i>genus_Lachnobacterium</i>              | rs9363741 | 6 LOC105377842  |
| STD4       | <i>family_Enterobacteriaceae</i>          | rs9401713 | 6 NKAIN2        |
| STD3       | <i>f_Geobacteraceae</i>                   | rs9482647 | 6 LOC107986640  |
| STD1       | <i>G_Clostridium_sensu_stricto_RNT</i>    | rs9563941 | 13 RFC3         |
| STD1       | <i>C_Gammaproteobacteria_HB</i>           | rs9569095 | 13 LOC105370213 |
| STD1       | <i>G_Clostridium_sensu_stricto_RNT</i>    | rs9570673 | 13 LOC105370156 |
| STD3       | <i>s_Romboutsia ilealis</i>               | rs987019  | 12 PPM1H        |
| STD4       | <i>genus_Desulfovibrio</i>                | rs9886211 | 7 GLI3          |

Chr: Chromosome.

STD1: Hughes DA, et al. 2020. [45]

STD2: Kurilshikov A, et al. 2021. [46]

STD3: Qin Y, et al. 2022. [51]

STD4: Davenport ER, et al. 2015. [43]

**Table S2. Association between the ordered (by p-value) microbiota-related SNPs and fasting glucose in the whole population1 (continuation of Table 2)<sup>1</sup>.**

| Chr | SNP        | Beta   | p       | MAF   | Gene              | Microbial trait                                 |
|-----|------------|--------|---------|-------|-------------------|-------------------------------------------------|
| 5   | rs2938462  | 2.170  | 0.12850 | 0.281 | <i>intergenic</i> | <i>F_Sutterellaceae_HB</i>                      |
| 16  | rs11865270 | -2.700 | 0.13160 | 0.179 | ZC3H18            | <i>G_Clostridium_sensu_stricto_HB</i>           |
| 5   | rs6890044  | 3.488  | 0.14030 | 0.082 | <i>intergenic</i> | <i>s_Massiliomicrobiota sp002160815</i>         |
| 1   | rs11164520 | 3.592  | 0.14140 | 0.159 | <i>intergenic</i> | <i>G_Faecalitalea_HB</i>                        |
| 2   | rs4988235  | -2.098 | 0.14490 | 0.161 | MCM6              | <i>s_Bifidobacterium bifidum</i>                |
| 2   | rs6746082  | -2.722 | 0.15160 | 0.385 | DTNB              | <i>genus_Desulfovibrio</i>                      |
| 2   | rs517403   | -2.493 | 0.15490 | 0.328 | DTNB              | <i>genus_Desulfovibrio</i>                      |
| 2   | rs12713340 | 3.150  | 0.16060 | 0.209 | LOC105377632      | <i>genus.Tyzzerella3.id.11335</i>               |
| 6   | rs7773795  | -3.374 | 0.16170 | 0.096 | RTN4IP1           | <i>g_Achromobacter</i>                          |
| 7   | rs9886211  | 2.170  | 0.16510 | 0.228 | GLI3              | <i>genus_Desulfovibrio</i>                      |
| 8   | rs2921739  | 1.903  | 0.19660 | 0.494 | <i>intergenic</i> | <i>genus_Lachnobacterium</i>                    |
| 10  | rs17551124 | 1.988  | 0.19680 | 0.255 | <i>intergenic</i> | <i>order_Rhizobiales</i>                        |
| 4   | rs16877040 | 3.382  | 0.20970 | 0.090 | ZCCHC4            | <i>O_Rhodospirillales_RNT</i>                   |
| 2   | rs1014174  | 1.726  | 0.21380 | 0.301 | PID1              | <i>genus..Ruminococcustorquesgroup.id.14377</i> |
| 15  | rs234545   | 1.912  | 0.21410 | 0.349 | <i>intergenic</i> | <i>s_Faecalibacterium prausnitzii_E</i>         |
| 3   | rs1014486  | 1.804  | 0.21800 | 0.321 | IL12A-AS1         | <i>genus.Ruminococcus1.id.11373</i>             |
| 5   | rs2109479  | -2.215 | 0.22410 | 0.277 | <i>intergenic</i> | <i>genus..Ruminococcustorquesgroup.id.14377</i> |
| 2   | rs936012   | -2.143 | 0.23160 | 0.370 | DTNB              | <i>genus_Desulfovibrio</i>                      |
| 1   | rs11165260 | 2.029  | 0.24240 | 0.126 | TGFBR3            | <i>g_Gillisia</i>                               |
| 6   | rs9401713  | -1.792 | 0.24590 | 0.391 | NKAIN2            | <i>family_Enterobacteriaceae</i>                |
| 2   | rs4662863  | -2.005 | 0.24940 | 0.283 | <i>intergenic</i> | <i>genus_Acinetobacter</i>                      |
| 1   | rs10489740 | -3.714 | 0.25110 | 0.075 | RXRG              | <i>genus_Fusobacterium</i>                      |
| 18  | rs7245009  | -2.057 | 0.25180 | 0.218 | DOK6              | <i>G_unclassified_K_Bacteria_RNT</i>            |
| 11  | rs4756282  | 5.759  | 0.25480 | 0.066 | LDLRAD3           | <i>F_Sutterellaceae_HB</i>                      |
| 2   | rs12995600 | 2.763  | 0.25590 | 0.063 | <i>intergenic</i> | <i>g_UBA2821</i>                                |
| 8   | rs10091890 | -1.967 | 0.26530 | 0.428 | CSMD1             | <i>genus.Romboutsia.id.11347</i>                |
| 2   | rs6730157  | -1.598 | 0.26540 | 0.158 | RAB3GAP1          | <i>G_Bifidobacterium_RNT</i>                    |
| 2   | rs10173920 | -1.624 | 0.26920 | 0.493 | LOC105373456      | <i>genus_Desulfovibrio</i>                      |
| 1   | rs12145410 | 1.668  | 0.27180 | 0.262 | ESRRG             | <i>family_Carnobacteriaceae</i>                 |
| 9   | rs12001400 | -1.706 | 0.27480 | 0.151 | DAPK1             | <i>O_Rhodospirillales_RNT</i>                   |
| 8   | rs2584     | -1.667 | 0.28280 | 0.132 | MCPH1             | <i>family_Succinivibrionaceae</i>               |
| 6   | rs12530260 | -1.631 | 0.28470 | 0.456 | NKAIN2            | <i>family_Enterobacteriaceae</i>                |
| 4   | rs2875425  | 2.694  | 0.29050 | 0.161 | ZCCHC4            | <i>O_Rhodospirillales_RNT</i>                   |
| 4   | rs7654391  | 3.220  | 0.29580 | 0.096 | <i>intergenic</i> | <i>F_Desulfovibrionaceae_HB</i>                 |
| 7   | rs10267710 | -1.551 | 0.30020 | 0.432 | <i>intergenic</i> | <i>class.Actinobacteria.id.419</i>              |
| 4   | rs17063770 | 2.962  | 0.30470 | 0.162 | <i>intergenic</i> | <i>F_Desulfovibrionaceae_HB</i>                 |
| 18  | rs4799294  | 2.772  | 0.30610 | 0.307 | <i>intergenic</i> | <i>G_Streptococcus_HB</i>                       |
| 17  | rs820136   | 3.710  | 0.30870 | 0.123 | MYO15B            | <i>F_Desulfovibrionaceae_HB</i>                 |
| 9   | rs12378680 | -1.556 | 0.31340 | 0.142 | DAPK1             | <i>O_Rhodospirillales_RNT</i>                   |
| 11  | rs1790213  | -1.453 | 0.32120 | 0.336 | SORL1             | <i>G_Dialister_HB</i>                           |
| 4   | rs16844460 | -3.617 | 0.33380 | 0.081 | DOK7              | <i>F_Sutterellaceae_HB</i>                      |
| 11  | rs11218350 | -1.696 | 0.33500 | 0.339 | SORL1             | <i>G_Dialister_HB</i>                           |

<sup>1</sup>: N = 1020 subjects. Model adjusted for sex, age, type 2 diabetes, BMI and medication. Chr: Chromosome. Beta: indicates the effect for the minor allele on fasting plasma glucose. p: P-value obtained in the multi-variable linear regression model adjusted for sex, age, type 2 diabetes, BMI and medication for each SNP using a genetic additive model. MAF: Minor Allele Frequency in this population.

Note: this table is the continuation of Table 2, then only SNPs from p>0.1209 to p≤0.3350 are shown.

**Table S3. Association between the microbiota-related SNPs and diabetes in non-diabetic subjects <sup>1</sup>.**

| Chr | SNP        | Beta   | <i>p</i> | MAF   | Gene          | Microbial trait                             |
|-----|------------|--------|----------|-------|---------------|---------------------------------------------|
| 5   | rs6890044  | 5.464  | 0.00317  | 0.082 | __            | <i>s__Massiliomicrobiota sp002160815</i>    |
| 12  | rs987019   | -2.840 | 0.04434  | 0.193 | PPM1H         | <i>s__Romboutsia ilealis</i>                |
| 1   | rs10914206 | -1.989 | 0.09038  | 0.349 | __            | <i>g__Hydrogenophaga</i>                    |
| 16  | rs35262813 | 2.637  | 0.11750  | 0.070 | __            | <i>s__UBA2922 sp900313925</i>               |
| 2   | rs182549   | -1.512 | 0.17800  | 0.163 | MCM6          | <i>s__Bifidobacterium adolescentis</i>      |
| 6   | rs7773795  | -2.309 | 0.21490  | 0.096 | RTN4IP1       | <i>g__Achromobacter</i>                     |
| 2   | rs4988235  | -1.393 | 0.21570  | 0.161 | MCM6          | <i>s__Bifidobacterium bifidum</i>           |
| 12  | rs7973111  | 2.601  | 0.22580  | 0.104 | LOC105369901  | <i>f__TMED109</i>                           |
| 15  | rs234545   | 1.472  | 0.23090  | 0.349 | __            | <i>s__Faecalibacterium prausnitzii_E</i>    |
| 2   | rs7580217  | 2.353  | 0.24010  | 0.242 | KCNK12        | <i>g__Parabacteroides</i>                   |
| 8   | rs6468721  | 1.349  | 0.27460  | 0.152 | __            | <i>c__Syntrophorhabdia</i>                  |
| 3   | rs6797860  | -1.273 | 0.31740  | 0.360 | TP63          | <i>s__Anaeromassilibacillus sp001305115</i> |
| 1   | rs11165263 | 1.336  | 0.31990  | 0.126 | TGFBR3        | <i>g__Gillisia</i>                          |
| 3   | rs6766789  | -1.665 | 0.35300  | 0.306 | FHIT          | <i>g__CAG-448</i>                           |
| 2   | rs2140551  | -0.926 | 0.41450  | 0.486 | STON1-GTF2A1L | <i>g__Prevotellamassilia</i>                |
| 22  | rs134974   | -0.901 | 0.42630  | 0.436 | __            | <i>f__Bin127</i>                            |
| 1   | rs4925523  | -0.983 | 0.44050  | 0.430 | __            | <i>s__Rubneribacter sp002159915</i>         |
| 6   | rs9482647  | -0.991 | 0.47780  | 0.195 | LOC107986640  | <i>f__Geobacteraceae</i>                    |
| 13  | rs2277424  | -1.050 | 0.52620  | 0.191 | LINC00346     | <i>c__Paceibacteria</i>                     |
| 3   | rs7631252  | 0.729  | 0.64950  | 0.215 | __            | <i>s__Lawsonibacter sp002161175</i>         |
| 12  | rs7958254  | 1.415  | 0.67990  | 0.135 | __            | <i>g__CAG-632</i>                           |
| 7   | rs12673506 | -0.426 | 0.74820  | 0.243 | CHN2          | <i>g__Parabacteroides</i>                   |
| 2   | rs12995603 | 0.617  | 0.75150  | 0.063 | __            | <i>g__UBA2821</i>                           |
| 20  | rs1035177  | 0.384  | 0.76690  | 0.315 | MACROD2       | <i>g__Holdemania</i>                        |
| 1   | rs12076104 | -1.079 | 0.77280  | 0.066 | CASZ1         | <i>s__Megasphaera elsdenii</i>              |

<sup>1</sup>: N = 546 subjects. Model adjusted for sex, age and BMI. Chr: Chromosome. Beta: indicates the effect for the minor allele on fasting plasma glucose. *p* : P-value obtained in the multi-variable linear regression model adjusted for sex, age and BMI for each SNP using a genetic additive model. MAF: Minor Allele Frequency in this population.



Table S4. Interaction between the top-ranked microbiota-related SNPs and sex on plasma fasting glucose in the whole population<sup>1</sup>.

| Chr | SNP       | Beta1  | SE1    | Beta2  | SE2   | p_GxSex | MAF   | Gene              | Microbial trait                          |
|-----|-----------|--------|--------|--------|-------|---------|-------|-------------------|------------------------------------------|
| 11  | rs367480  | 7.795  | 2.959  | -3.502 | 2.112 | 0.0019  | 0.438 | SLC22A18          | order.Gastranaerophilales.id.1591        |
| 11  | rs7129903 | 13.170 | 5.414  | -4.182 | 3.627 | 0.0078  | 0.248 | <i>intergenic</i> | G_Blautia_RNT                            |
| 4   | rs1313214 | -9.893 | 4.013  | 3.131  | 2.865 | 0.0083  | 0.157 | <i>intergenic</i> | order_Selenomonadales                    |
| 16  | rs1186527 | 2.527  | 3.612  | -8.265 | 2.725 | 0.0171  | 0.179 | ZC3H18            | G_Clostridium_sensu_stricto_HB           |
| 6   | rs9401713 | -8.307 | 3.212  | 1.058  | 2.299 | 0.0178  | 0.391 | NKAIN2            | family_Enterobacteriaceae                |
| 6   | rs1253026 | -7.272 | 3.173  | 1.843  | 2.271 | 0.0195  | 0.456 | NKAIN2            | family_Enterobacteriaceae                |
| 6   | rs1490359 | -6.810 | 3.141  | 2.075  | 2.274 | 0.0220  | 0.448 | NKAIN2            | family_Enterobacteriaceae                |
| 6   | rs4479964 | -5.463 | 2.926  | 2.681  | 2.082 | 0.0233  | 0.344 | ARHGAP18          | genus_Bifidobacterium                    |
| 4   | rs1194069 | -9.675 | 2.916  | -1.583 | 2.120 | 0.0248  | 0.499 | KLB               | genus..Ruminococcustorquesgroup.id.14377 |
| 6   | rs853964  | 11.090 | 6.714  | -9.684 | 6.667 | 0.0281  | 0.010 | LOC105377992      | C_Deltaproteobacteria_HB                 |
| 11  | rs1699103 | 5.478  | 3.071  | -2.588 | 2.182 | 0.0323  | 0.267 | SORL1             | G_Dialister_HB                           |
| 16  | rs1259738 | 20.270 | 8.405  | -0.272 | 4.666 | 0.0327  | 0.052 | <i>intergenic</i> | G_Odoribacter_HB                         |
| 11  | rs639648  | 5.173  | 3.091  | -2.687 | 2.177 | 0.0376  | 0.260 | SORL1             | G_Dialister_HB                           |
| 11  | rs4756282 | 28.990 | 11.970 | 1.272  | 7.091 | 0.0464  | 0.066 | LDLRAD3           | F_Sutterellaceae_HB                      |
| 15  | rs234545  | -2.303 | 3.388  | 5.542  | 2.222 | 0.0529  | 0.349 | <i>intergenic</i> | s_Faecalibacterium prausnitzii_E         |

<sup>1</sup>: N = 1020 subjects. Chr: Chromosome. Beta: indicates the effect for the minor allele on fasting plasma glucose concentrations. Beta 1 and SE 1: indicates the regression coefficients and SE in men (50%). Beta 2 and SE 2: indicates the regression coefficients and SE in women. p\_GxSex: indicates the p-value for the interaction term between each SNP and sex in the corresponding hierarchical general linear regression model including the main effects and interaction terms in the whole population. MAF: minor allele frequency.

**Table S5. Selected instruments for the Two-sample Mendelian randomization analysis on plasma glucose.**

| SNP        | Microbial trait                   | Exposure (Microbiome) <sup>1</sup> |       |    |       |          | Outcome (Fasting glucose) <sup>2</sup> |       |       |        |
|------------|-----------------------------------|------------------------------------|-------|----|-------|----------|----------------------------------------|-------|-------|--------|
|            |                                   | Beta                               | SE    | EF | MAF   | p        | Beta                                   | SE    | MAF   | p      |
| rs10914206 | g__Hydrogenophaga                 | 0.027                              | 0.005 | T  | 0.284 | 1.70E-08 | 1.446                                  | 1.828 | 0.349 | 0.4291 |
| rs11947461 | o__Chloroflexales                 | 0.021                              | 0.004 | T  | 0.393 | 2.90E-08 | 1.833                                  | 1.804 | 0.336 | 0.3097 |
| rs12673506 | g__Parabacteroides                | 0.102                              | 0.018 | A  | 0.201 | 8.00E-09 | -1.493                                 | 2.071 | 0.243 | 0.4712 |
| rs234545   | s__Faecalibacterium prausnitzii_E | 0.051                              | 0.009 | C  | 0.445 | 2.40E-08 | -2.325                                 | 1.874 | 0.349 | 0.2150 |
| rs6468721  | c__Syntrophorhabdia               | 0.024                              | 0.004 | C  | 0.265 | 3.50E-08 | -2.662                                 | 2.005 | 0.152 | 0.1846 |
| rs6766789  | g__CAG-448                        | 0.158                              | 0.027 | A  | 0.083 | 9.10E-09 | -5.660                                 | 2.933 | 0.306 | 0.0539 |
| rs7773795  | g__Achromobacter                  | 0.034                              | 0.006 | C  | 0.095 | 4.00E-08 | -4.571                                 | 2.951 | 0.096 | 0.1217 |
| rs9482647  | f__Geobacteraceae                 | 0.035                              | 0.006 | G  | 0.098 | 3.60E-08 | -2.177                                 | 2.126 | 0.195 | 0.3060 |
| rs987019   | s__Romboutsia ilealis             | 0.076                              | 0.013 | T  | 0.166 | 8.40E-09 | 4.015                                  | 2.239 | 0.193 | 0.0733 |

SE: Standard error. EF: Effect allele. MAF: Minor Allele Frequency.

<sup>1</sup>: The association between the effect allele genetic variant (instrumental variable) and the exposure (Microbiome) was obtained from summary statistics published by Qin Y, et al. 2022 [51]. The effect allele for the exposure was harmonized to obtain a positive Beta (increasing effect in the exposure).

<sup>2</sup>: The second population was our Mediterranean population where the Beta was expressed for the same effect allele considered for the exposure.
